# The biogeography and biodiversity of endophytes—how far have we come and where do we go from here?

Joshua G. Harrison<sup>1</sup>, Eric A. Griffin<sup>2</sup>

<sup>1</sup>Department of Botany, University of Wyoming, Laramie, WY 82071, USA

<sup>2</sup> New Mexico Highlands University, Las Vegas, NM 87701, USA

*Corresponding author:* Joshua G. Harrison  
1000 E. University Ave.  
Department of Botany, 3165  
University of Wyoming  
Laramie, WY 82071, USA  
joshua.harrison@uwyo.edu

*Keywords:* endophytes, fungal endophytes, bacterial endophytes, phyllosphere, microbial ecology, biodiversity, biogeography, plant-microbe interactions

*Running title:* Endophyte biogeography

Author contributions: JGH and EAG conducted literature survey and wrote manuscript.

## Abstract

1 The interiors of plants are colonized by a diverse group of microorganisms. Many of these  
2 microbes do not harm their hosts in obvious ways for at least a portion of their life history  
3 and are referred to as endophytes. Because of their capacity to influence host phenotypes,  
4 endophytes have received a great deal of attention over the past few decades, yet basic  
5 questions of endophyte biogeography, ecology, and evolution remain unanswered. To deter-  
6 mine the state of endophyte biodiversity exploration—at multiple spatial scales and across  
7 the plant phylogeny—we synthesized results from nearly 600 published studies. Our sur-  
8 vey revealed a global interest in endophyte biology and highlighted several pressing gaps in  
9 knowledge. For instance, of the seventeen biomes encompassed by our survey, seven had  
10 fewer than 50 studies (including the boreal, alpine, and tropical grasslands biomes, among  
11 others) and together composed only 7% of the studies we considered. We found that fungal  
12 endophyte diversity has been characterized in at least one host from 31% of embryophyte  
13 families, while bacterial endophytes have been surveyed in hosts from only 10.5% of families.  
14 We complimented our broad survey with a meta-analysis and vote counting procedure to  
15 determine endophyte richness and diversity patterns at a small spatial scale—among plant  
16 tissue types. We found that variation in fungal endophyte richness and diversity among  
17 above-ground tissues differed as a function of host growth habit. Stems were the richest  
18 tissue in woody plants, whereas roots were the richest tissue in graminoids. For forbs, we  
19 observed no clear pattern of one tissue type harboring the most endophytic taxa. We propose  
20 a series of future directions and guidelines to fill the gaps in knowledge we uncovered and  
21 inspire further research.

## 22 Introduction

23 In 1887, Galippe reported that microbes could reside within the tissues of healthy plants.  
24 At the time, this work was unappreciated, perhaps because of the long-prevailing attitude  
25 that microbial assemblages solely comprised deleterious pathogens (Compant et al. 2012).  
26 Nevertheless, Galippe’s observations set the stage for an exploration of the plant microbiome  
27 that took place during the early to mid 1900s. During those decades, knowledge began to  
28 accumulate regarding the diversity, prevalence, and ecological roles of so called “endophytes”  
29 (Box 1; Campbell 1908, Hyde and Soyong 2008), with most early work focused on the fungi  
30 living within grasses (e.g., Neill 1940, Sampson 1937). Seminal research in the 1970s and  
31 80s led to widespread acknowledgement of the ubiquitous nature of non-pathogenic fungi  
32 and bacteria in plant tissues (Carroll and Carroll 1978, Carroll 1988, Petrini 1991). These  
33 studies have inspired intense and ever-growing interest from microbial ecologists (Fig. 1), yet  
34 answers to many basic questions regarding the natural history, biogeography, ecology, and  
35 evolution of endophytes remain elusive.

36 However, it is clear that fungal and bacterial endophytes are important—even critical—  
37 components of the world’s ecosystems. Endophytes can affect plant phenotype, including  
38 decreasing disease susceptibility (Arnold et al. 2003, Busby et al. 2016, Christian et al. 2017,  
39 Compant et al. 2005, Herre et al. 2007), shaping phytochemical profiles (Kusari et al. 2012,

40 Panaccione et al. 2014), and mediating plant functional trait expression (Griffin et al. 2016,  
41 Friesen et al. 2011). Recent work has demonstrated how these various effects of endophytes  
42 can influence whole ecosystem level processes (Christian et al. 2019, Clay and Holah 1999,  
43 Griffin et al. 2017, Laforest-Lapointe et al. 2017b). Importantly, endophytes are often erro-  
44 neously assumed to have predominantly mutualistic associations with their hosts. Reality is  
45 much more complex and the influence of endophyte taxa is highly context dependent (Car-  
46 roll 1988), with interactions between hosts and endophytes ranging from mutualism through  
47 commensalism to latent or mild antagonism (Hardoim et al. 2008, Schulz and Boyle 2005,  
48 Saikkonen et al. 1998).

49 Much of the interest in endophytes has been driven by applied scientists interested in  
50 harnessing endophytes as a means to manipulate plant phenotype (e.g., increase growth;  
51 Doty 2008) and prevent pathogen colonization of crops (Busby et al. 2017). Endophytes have  
52 also attracted attention from natural products chemists who survey the world’s organisms  
53 for useful compounds (Aly et al. 2010, Strobel and Daisy 2003). This is motivated by the  
54 capacity of various endophytes to synthesize an impressive array of bio-active small molecules  
55 (Newman et al. 2003, Strobel et al. 2004, Verma et al. 2009). Indeed, a number of endophyte-  
56 synthesized compounds are of medicinal value (Kharwar et al. 2011, Strobel et al. 1996).

57 Both basic and applied research regarding endophytes have been hampered by the lack  
58 of knowledge regarding endophyte biogeography. Biogeography is an inductive science that  
59 relies upon description of patterns in biodiversity to understand the forces that could have  
60 caused those patterns (Nemergut et al. 2013). Research by Higginbotham et al. (2013)  
61 provides an exemplar of how biogeographic knowledge can have both basic and applied  
62 implications. These researchers isolated over 3000 endophytic fungi from numerous tropical  
63 angiosperms and ferns and tested these cultures against common diseases, including malaria,  
64 Chagas disease, and cancer. They report that 30% of the fungi showed strong activity  
65 against at least one of the focal diseases and that bioactivity against a specific target was  
66 non-randomly distributed across the fungal phylogeny. Intriguingly, they also reported a  
67 generally higher degree of bioactivity in taxa sourced from cloud forests compared to lowland  
68 tropical forests—thus providing a biogeographic road-map for natural product discovery in  
69 tropical forests (also see Schulz et al. 2002).

70 Most of what is currently known regarding endophyte biogeography is limited to relatively-  
71 small spatial scales. For instance, many studies have confirmed that endophyte assemblages  
72 vary within hosts among tissue types (e.g., the endophyte assemblages in roots differ from  
73 those in the leaves; Coleman-Derr et al. e.g., 2016), though general patterns in endophyte  
74 richness among tissue types have not been described. Also, it is clear that endophyte as-  
75 semblages shift among coexisting host species, at least to some extent (Griffin et al. 2019,  
76 Redford et al. 2010, Vincent et al. 2015). While these patterns may not seem to encompass  
77 a broad enough spatial scale to be “biogeographic” in the traditional sense, it must be re-  
78 membered that the disparity in size between a single bacterium of  $2\ \mu\text{m}^3$  and a large tree of  
79  $500\ \text{m}^3$  mirrors the ratio in scale between an automobile and a mid-sized country (as demon-  
80 strated in Fig. 1 of Remus-Emsermann and Schlechter 2018). Thus, the spatial scale at  
81 which endophytes are sampled—for example, the leaf or some portion thereof—encompasses  
82 significant biogeographical variation from a microbial perspective. Indeed, using traditional  
83 culturing and sequencing methodologies, we can only sample what are in effect whole “re-

84 gions” of endophytes that may include multiple assemblages that never directly interact.  
85 This complicates the study of endophyte biogeography because the scale of sampling is so  
86 much larger than many covariates that may affect membership of endophytes in a particular  
87 assemblage. For instance, microhabitat variation within leaves (such as proximity to upper  
88 or lower leaf surfaces, veins, etc.) may have affects on endophyte assemblages akin to the  
89 effects of shifting elevation on forest composition across a mountainside, and those forcings  
90 are unavailable for study when the unit of replication is an entire leaf, or even a leaf section  
91 (Herre et al. 2007, Lodge et al. 1996, Remus-Emsermann and Schlechter 2018, Vacher et al.  
92 2016a). To further complicate matters, bacterial endophytes can live inside endophytic fungi  
93 (Shaffer et al. 2016), thus, for these bacterial endophytes, the habitat covariates most rele-  
94 vant for explaining inter-assemblage variation may be the traits of the host fungus, not the  
95 traits of the host plant.

96 At larger spatial scales, including across broad latitudinal and elevational gradients, and  
97 among biomes and continents, several patterns have emerged. Typically, endophyte assem-  
98 blages are characterized by dramatically skewed rank abundance curves, where a few taxa  
99 are much more abundant than the numerous marginal taxa present (e.g., Davis and Shaw  
100 2008, Shade and Handelsman 2012) and the similarity in assemblages declines with distance,  
101 though the causes of this decline are likely multifarious and poorly understood. This phe-  
102 nomenon is often referred to as “distance-decay” in assemblage similarity (Davis and Shaw  
103 2008, Higgins et al. 2014, Nemergut et al. 2013, Vacher et al. 2016b). Moreover, seminal work  
104 by Arnold and Lutzoni (2007) showed that fungal endophyte diversity tended to increase at  
105 lower latitudes, thus mirroring the latitudinal gradient in biodiversity experienced by so  
106 many large, multicellular taxa (Pianka 1966). Also, several studies have reported greater  
107 fungal endophyte richness in wetter locations (Lau et al. 2013, Zimmerman and Vitousek  
108 2012), and, that more generally, endophyte biogeography is influenced by elevational and  
109 climatic variation. For example, Bowman and Arnold (2018) found that *Pinus ponderosa*  
110 hosted more diverse foliar fungal endophyte communities at mid-to-high elevations compared  
111 to lower elevations in southwestern Arizona (also see Giauque and Hawkes 2013). These pat-  
112 terns confirm that endophytes, like other microbes, do have meaningful biogeography that is  
113 shaped by contemporary circumstance (i.e, habitat variation; the Baas Becking hypothesis  
114 that “everything is everywhere, but the environment selects”; Baas Becking 1934). However,  
115 it remains unclear how historical factors and ecological drift influence endophyte distribution  
116 at any spatial scale (for a primer on the possible roles of these forces in community assembly  
117 see Nemergut et al. 2013 and Vellend 2010).

118 To understand the scope of research characterizing endophyte biodiversity and biogeogra-  
119 phy, we scoured the literature and extracted basic metadata from 596 studies characterizing  
120 endophyte assemblages. Our primary goal was to synthesize the foci of studies completed  
121 to date, ultimately with the hopes of highlighting particular portions of the plant phylogeny  
122 and specific biomes that need further exploration. Next, we paired this survey with a meta-  
123 analysis and vote counting procedure where we compared patterns of endophyte richness and  
124 diversity among tissue types. Our synthesis highlighted the challenges of pooling information  
125 among studies and, consequently, we offer specific guidelines for data sharing and research  
126 reproducibility moving forward.

### Box 1. What, exactly, is an endophyte?

The term ‘endophyte’ is believed to have originated with de Bary (1866), who so dubbed pathogenic, plant-inhabiting microbes, because of their habitat. Since then, the term endophyte has been expanded to invoke both a habitat and a non-pathogenic lifestyle, and encompasses fungal (Rodriguez et al. 2009, Petrini 1991), bacterial (Griffin and Carson 2015, Ryan et al. 2008), and archaeal taxa (Moissl-Eichinger et al. 2018, Müller et al. 2015). In our experience, contemporary microbial ecologists most often use the term endophyte to refer to those taxa that live inside of plant tissues and, which over some portion of their life history, do not cause obvious harm to their hosts, such as inducing a hypersensitive response (Wilson 1995, Petrini 1991, Stone et al. 2000). The lack of precision in this definition is somewhat unsatisfying, but does hint at the complex life histories of many endophytic taxa (Rodriguez et al. 2009). Indeed, for perhaps the majority of endophytic taxa, individuals are horizontally transmitted among hosts and, consequently, may exist outside of the plant corpus for some time, for instance as spores or endospores, free living cells or colonies, or as epiphytic fruiting bodies on decaying tissue (Malloch and Blackwell 1992, Rodriguez et al. 2009). The term endophyte is particularly strained by the mycorrhizal fungi, which possess a mycelium that grows externally to the host but that also penetrates the root epidermis (Schulz and Boyle 2006, Jumpponen 2001). In some cases, mycorrhizae are found growing wholly within plant tissues, and their categorization as endophytes seems to be on an author-by-author basis (Schulz and Boyle 2006). These examples illustrate how the term endophyte is useful for communication, but not biologically well-delineated. For our purposes in this article, we do not consider obligate pathogens, epiphytes, or mycorrhizae; nor do we include a review of the large body of literature examining *Rhizobia* and their associations with legumes, as others have already done so (e.g., Peter et al. 1996, Willems 2006).

127

## 128 Methods

129 We searched Google Scholar and Web of Science for the term “endophyte” in conjunction  
130 with “fungal”, “bacterial”, “diversity”, or “community”. All publications in which the authors  
131 characterized endophyte assemblage biodiversity were collated. Studies of root endophytes  
132 were included, but those studies that focused on mycorrhizae were omitted from consider-  
133 ation. As we were primarily interested in studies characterizing endophyte biodiversity, we  
134 did not consider research involving manipulative experiments where no survey of microbial  
135 diversity was conducted. We also made the choice to omit studies that did not distinguish  
136 between epiphytes and endophytes through performing some form of surface sterilization.  
137 Searches were performed periodically from 2016–2018 and additional studies added to our  
138 database as we became aware of them until the beginning of 2019. We apologize to authors  
139 who have published their work in non-English language journals, which were inaccessible to  
140 us.

141 From each study, we collected information on host organism(s) studied, research loca-  
142 tion(s), tissue type(s) surveyed, and various metadata describing the nature of the survey  
143 conducted—for instance, if the endophyte assemblage was characterized via sequencing or  
144 culturing, if spatial or temporal replication was employed, host and culture vouchers de-  
145 posited, and data made available. If the study location was not explicitly provided, we  
146 extrapolated an estimate based on the city or country reported by the authors. We assigned  
147 studies to biomes following the nomenclature of Olson et al. (2001). We found few studies  
148 conducted within dunes and on beaches and so combined them with those from the flooded  
149 grassland biome. Host plants collected from urban, agricultural, or areas that were otherwise  
150 managed, were classified as coming from “cultivated” landscapes, and these studies are not  
151 included in our estimates of the number of studies for each biome because managed areas  
152 experience ecological contingencies divergent from their surroundings (e.g., irrigation). We  
153 considered studies of “stems” as those involving sampling of woody branches, twigs, or grass  
154 shoots. Studies of “roots” included any survey of below-ground plant tissue, but excluded  
155 rhizosphere soil surveys. We considered studies of “leaves” to be those sampling leaf sec-  
156 tions or whole leaves/leaflets (including needles), and did not consider studies that sampled  
157 petioles.

158 To understand the phylogenetic breadth of host plants surveyed, we calculated the total  
159 number of hosts examined for each plant family and plotted this information on a phylogeny  
160 of the Embryophyta (algal endophyte hosts were thus omitted from this portion of our  
161 analysis) generated using phyloT (online software accessible at [https://phylot.biobyte.](https://phylot.biobyte.de/)  
162 [de/](https://phylot.biobyte.de/)). The National Center for Biotechnology Information taxonomy database was used to  
163 generate the tree (database accessed March 15, 2019; Federhen 2012). iTOL v4.3.2 was used  
164 for tree visualization (Letunic and Bork 2016). All data wrangling was performed in the R  
165 statistical computing environment (R Core Team 2019).

## 166 **Meta-analysis**

167 In addition, we asked how endophyte richness shifted among tissue types, for both fungi and  
168 bacteria. We took two approaches to address this question—a formal meta-analysis and a  
169 simple vote counting approach. Because few studies used the same methods, comparing the  
170 effects of tissue type on richness *among* studies was inappropriate (this limitation precluded  
171 comparison of richness among taxa or across biomes, unfortunately). Thus, we only examined  
172 those studies that compared richness among multiple tissue types—thus all comparisons were  
173 made *within* studies. We omitted those studies that did not standardize observational effort  
174 among tissues by either mass or sample count (i.e., the number of samples from each tissue  
175 type). We also only considered studies that provided a table describing the counts of each  
176 microbial taxon observed within each sample (e.g., an operational taxonomic unit [OTU]  
177 table), because these data were required to calculate diversity and richness indices. Out of  
178 the 558 studies that examined multiple tissues, nine met these criteria for fungi. For bacteria,  
179 only a single study met these criteria, precluding a formal meta-analysis, thus for this taxon  
180 we only performed vote counting, which required a less stringent set of criteria for study  
181 selection (see below). We rarefied each OTU table by the minimum number of observations  
182 for a sample within that study and calculated richness and exponentiated Shannon’s diversity

183 for each sample. Calculations were performed using the `vegan` R package v2.5-5 (Oksanen  
184 et al. 2016). A random effects model was used to estimate differences in richness and diversity  
185 between tissue types while accounting for among-study variation. Models were implemented  
186 using the `metafor` v2.1-0 (Viechtbauer 2010) R package using a restricted maximum likelihood  
187 estimation approach.

188 Given the paucity of studies that met our criteria for meta-analysis, we decided to con-  
189 duct a simple vote counting procedure where we considered each study independently and  
190 ranked tissue types by the relative richness reported in that study. We examined 243 stud-  
191 ies in this way: 182 studies of fungal endophytes and 61 studies of bacterial endophytes  
192 (these studies met the aforementioned criteria, save the provision of an OTU table). After  
193 ranking tissues by relative richness separately for each study, we calculated, across studies,  
194 the proportion of times one tissue type had higher richness than another tissue (e.g., for  
195 what proportion of studies did leaves have higher richness than roots) and tested the signif-  
196 icance of these proportions using a binomial sign test (Cooper and Hedges 1993). This test  
197 is simply the probability of observing a particular number, or more, of positive outcomes  
198 (in our case, one tissue type having higher richness than another) given a certain number  
199 of trials and assuming equal probability of positive and negative outcomes. For this vote  
200 counting approach, we focused on richness because fewer studies reported diversity metrics  
201 and, when not explicitly reported by authors, relative richness was simpler to calculate and  
202 extract from published summary tables and figures than were diversity entropies. To test  
203 how growth habit influenced relative microbial richness among tissues, we conducted vote  
204 counting separately for studies of hosts with the following growth habits: woody-stemmed  
205 trees and shrubs, forbs, and graminoids.

## 206 Results

207 Our survey highlighted the breadth of the endophyte biodiversity literature, as we extracted  
208 data from 596 unique publications. This level of research interest is all the more impressive  
209 given that few studies were included in our survey from before the mid 1970s. We report  
210 that interest in endophyte diversity is on the rise, with a sharp increase in studies per year  
211 since 2010 (Fig. 1). Fungi have received comparatively more attention than bacteria, though  
212 this disparity is diminishing (Figs. 1 & 2e). The majority of studies were of foliar endophytes  
213 (1694 unique combinations of study and host species), followed by root (577 combinations)  
214 and stem (540 combinations) endophytes. By comparison, floral tissues (39 combinations)  
215 and plant propagules were understudied (172 combinations; Fig. 2). Multiple-host studies  
216 were not the norm—approximately ~66% of studies focused on a single host taxon.

### *The global scale of endophyte biodiversity research*

217 The geographical range encompassed by the studies we considered was impressive; endo-  
218 phytes, both fungal and bacterial, have been recovered from hosts across all major biomes  
219 and all continents (Fig. 3). Temperate mixed coniferous and deciduous forests were the best  
220 studied biomes, with 98 studies (16% of total). However, the most unique combinations of  
221 host and study were reported from tropical and subtropical wet forests (471, 21% of total).

222 This was due to several studies that surveyed many hosts within these forests (e.g., Rojas-  
223 Jimenez et al. 2016 with 92 hosts and Suryanarayanan et al. 2011 with 70 hosts). In terms  
224 of unique studies, research in tropical and subtropical forests composed a more modest 13%  
225 of studies in our survey. Many biomes were quite understudied. For instance, seven of the  
226 seventeen biomes that we considered had 50 or fewer studies (Fig. 2b). Together, studies  
227 from these biomes composed only 7% of the publications surveyed.

228 Across biomes, we found comparatively few studies of hosts growing in obvious wilderness,  
229 far from human development. Indeed, 33% of studies relied on hosts grown in cultivated  
230 environments, including urban locations, agricultural landscapes, and greenhouses (with  
231 university campuses being particularly well sampled). This estimate may be conservative  
232 as for some studies the exact collection location was difficult to determine and so we did  
233 not include them in the “cultivated” category, but sampling was likely not far from human  
234 development.

*Much of the host phylogeny remains unsampled*

235 The studies we surveyed encompassed 1702 unique taxa from 254 plant families. Poaceae  
236 was by far the most well-studied family (189 hosts studied), followed by Fabaceae (98 hosts),  
237 Pinaceae (82 hosts), and Asteraceae (79 hosts; Fig. 4). Fungal endophytes have been sur-  
238 veyed in hosts from 31% of plant families listed in the NCBI taxonomy database for Em-  
239 bryophyta. By comparison, bacterial endophytes have been characterized in only 10.5% of  
240 plant families. Of particular note, very few observations of foliar microbiota have been made  
241 among bryophyte and pteridophyte families (Fig. 4). Liverwort families have been compara-  
242 tively well surveyed due to a single, excellent paper by Davis and Shaw (2008). Additionally,  
243 we observed a striking mismatch between host family species richness and sampling effort.  
244 For instance, only 29 Orchidaceae species have been surveyed out of the approximately 28,000  
245 accepted orchid taxa occurring worldwide (The Plant List, Chase et al. 2015).

*Replication and reproducibility could be improved*

246 We also characterized details for each study regarding sampling scheme and reproducibil-  
247 ity (Fig. 2de). We found that just over half of studies were spatially replicated (sampling  
248 areas were separated by at least a km) and fewer than a quarter of studies were temporally  
249 replicated. The majority of studies (~77% of both fungi and bacteria) relied on culturing,  
250 however less than half of these studies reported accessioning cultures (Fig. 2e). By compari-  
251 son, 37.6% of studies that relied on sequence data provided clear instructions for downloading  
252 raw data, though only 22% of these studies provided processed data (such as an OTU table).  
253 Surprisingly, fewer than 20% of studies mentioned accessioning host vouchers. For cultivated  
254 plants, we considered a description of the cultivar as equivalent to an accessioned voucher.

*The effects of tissue type on endophyte richness and diversity*

255 We performed vote counting and a meta-analysis to compare the relative richness and  
256 diversity of fungal endophyte assemblages in varying tissue types across plant taxa. Across  
257 all hosts considered via meta-analysis, we found no significantly supported differences among  
258 tissue types in richness or Shannon’s diversity (Figs. S1 & S2). However, our vote count-  
259 ing approach allowed us to examine many more studies than the meta-analysis and clearly  
260 demonstrated that relative tissue richness was dependent upon host growth habit. For  
261 instance, stems had richer fungal endophyte assemblages than leaves for woody-stemmed



262 hosts, but this pattern was not observed for either forbs or graminoids (Table S1). By com-  
263 parison, for graminoids, roots had richer fungal and bacterial endophyte assemblages than  
264 stems (Table S3). For forbs, no tissue type was clearly richer, on average, than other tis-  
265 sues (Table S2). Additionally, for fungal endophytes, we found that reproductive structures,  
266 including flowers and propagules, were relatively species poor, while bark was species rich  
267 (Table S1 & S2), though these results are tentative given the few studies that compared  
268 endophyte assemblages in these tissues to those in other portions of the plant corpus.

## 269 Discussion

270 We enthusiastically report a global interest in the study of endophyte biodiversity that is  
271 intensifying dramatically as awareness builds regarding the ecological importance of plant mi-  
272 crobiomes (Fig. 1). Over just the past few decades, hundreds of studies have been published  
273 that demonstrate the ubiquity and taxonomic diversity of endophytes. This is heartening  
274 and confirms a rapid growth in understanding of endophyte biogeography and biodiversity.  
275 Our survey highlighted several gaps in knowledge that should be the target of focused effort  
276 as we build upon the existing body of work. Most importantly, we found that vast portions  
277 of the globe, including many important biomes, are understudied and the potential of the  
278 plant phylogeny to harbor novel endophyte lineages is only beginning to be explored. We  
279 also report that host growth habit influences the relative richness among tissue types for  
280 both fungi and bacteria.

*Endophyte research spans the globe, but certain biomes and continents remain understudied*

281 Endophyte biodiversity has been studied on every continent and within all biomes (Fig. 3).  
282 Given that widespread interest in endophytes did not occur until the 1970s, progress has been  
283 rapid and is worth celebration. However, great swathes of the globe still remain unsurveyed.  
284 Certain biomes have been particularly understudied—either due to their high biodiversity,  
285 which makes thorough sampling exceptionally difficult (i.e., tropical rainforests); large geo-  
286 graphical area (the boreal forest); or because they are geographically restricted and simply  
287 have not received much attention (mangroves). For instance, we found only 17 studies from  
288 coastal dunes and flooded grasslands, when excluding studies from rice paddies. These habi-  
289 tats are challenging for plants, due to salinity, short intervals between disturbances, and,  
290 for flooded grasslands, the presence of anoxic soil. Surveys of understudied biomes will help  
291 define the scope of endophyte biodiversity. In particular, we suggest that surveys in flooded  
292 grasslands and mangroves may improve our understanding of archaeal endophyte biodiver-  
293 sity (Moissl-Eichinger et al. 2018), as this branch of life includes numerous halophiles and  
294 other extremophiles that may be able to cope with the harsh conditions characteristic of  
295 those locations. Similarly, studies in desert and alpine biomes may uncover endophytes with  
296 unique mechanisms for coping with the severe ultraviolet exposure, temperature swings, and  
297 desiccation that occurs in those habitats (Lopez et al. 2011, Massimo et al. 2015, Sangamesh  
298 et al. 2017).

299 A thorough characterization of inter-biome variation in endophyte biodiversity would  
300 further knowledge of how abiotic forces shape endophyte assemblages—a goal that has long  
301 been pursued by microbial ecologists (e.g., Nemergut et al. 2013, Zimmerman and Vitousek

2012). For instance, we still do not have a robust understanding of the relative importance of various abiotic gradients for broad patterns of endophyte richness and diversity or how these gradients might affect specific taxa (e.g., fungi versus bacteria or Ascomycetes versus Basidiomycetes). Such knowledge will be of critical practical importance as the climate continues to change, given that we wish to predict how endophyte assemblages will respond to shifts in precipitation, temperature, and disturbance regimes that come with global warming (Bálint et al. 2015, Giauque and Hawkes 2013). Importantly, endophyte assemblages can include latent pathogens that do not become symptomatic until times of host stress, including, stress due to drought or heat (Carroll 1988, Slippers and Wingfield 2007, Stanosz et al. 2001), thus it is likely that climate change related stressors will have profound effects on endophyte assemblages. Indeed, in an experimental warming and relocation experiment of *Populus balsamifera*, Bálint et al. (2015) reported that transplantation to northern latitudes led to an decrease in the relative abundance of *Mycosphaerella* fungi, a group that includes many pathogens, but that this effect was counteracted to a degree by experimental warming. Coupling manipulative experiments of this kind with data from large-scale surveys will be critical to disentangle the often confounded effects of abiotic forcings, geography, and climate change.

We also reported a lack of studies from Africa, west and north Asia, and the interiors of Australia and South America (Fig. 3). These areas hold some of the most biodiverse and charismatic landscapes on the planet; for instance, the Congo basin is the second largest tropical rainforest in the world, with thousands of endemic plant taxa (Brenan 1978, Linder 2001), and it has experienced less deforestation than other rainforests (Koenig 2008). Similarly, the Cape Floristic province in Africa has some of the highest levels of plant endemism in the world. Because these regions have evolutionary histories that have facilitated endemism, it seems likely that they harbor unique endophyte taxa and would be prime locations to study coevolution and codivergence between plants and endophytes. More generally, the lack of sampling outside of North American, Europe, and portions of Asia precludes a robust knowledge of endophyte biogeography, and sampling a variety of host taxa from poorly surveyed areas should be a priority moving forward.

#### *The influence of human development on endophyte biodiversity*

We acknowledge the logistical challenges of sampling the more remote locations that remain understudied. Indeed, we report an imprint of this challenge in even relatively well-studied regions, where we found that few studies were conducted more than a few kilometers from roadways, townships, and other human development. The lack of sampling in wilderness areas likely biases our nascent understanding of endophyte biodiversity. Human development is associated with pollution, habitat fragmentation, ecosystem disturbance frequency, and the abundance of introduced hosts (Crown et al. 2008, Dietz et al. 2007)—all of which likely affect plant microbiomes. Evidence for this hypothesis is sparse, however Laforest-Lapointe et al. (2017a) reported many phyllosphere bacterial taxa shift in relative abundance along an urbanization gradient, with an overall decline in dominant Alphaproteobacteria with more urbanization. Similarly, Lappalainen et al. (1999) reported a decline in endophyte colonization of *Betula* trees with proximity to copper-nickel smelter. Variation in heavy metal concentrations (Tóth et al. 2009, Jurc et al. 1996), acid rain (Helander et al. 1994), and air pollution (Wolfe et al. 2018), have all been associated with shifts in endophyte assemblages—

345 thus, it seems likely that the effects of pollution and urbanization are multifarious and have  
346 effects which depend upon the endophytic taxon examined and the ecological context.

347 In addition to pollution, habitat fragmentation also increases in proximity to human  
348 development. Very little is known regarding how habitat fragmentation affects microbial  
349 assemblages or, more generally, how metacommunity processes manifest within microbiomes  
350 (Christian et al. 2015). However, classic island biogeography theory (MacArthur and Wilson  
351 2001) suggests that human-caused habitat fragmentation likely shapes endophyte assem-  
352 blages through determining proximity to inoculum sources. In a survey spanning islands  
353 of various sizes, Helander et al. (2007) reported that endophyte colonization of *Betula* spp.  
354 trees was greater on larger islands and islands closer to the mainland (also see Oono et al.  
355 2017). This result, coupled with work documenting dispersal limitation in non-endophyte,  
356 microbial systems (Golan and Pringle 2017, Peay et al. 2010, 2007, Andrews et al. 1987) sug-  
357 gests that it is reasonable to expect variation in endophyte assemblages routinely follows the  
358 predictions of island biogeography, regardless of whether habitat fragmentation and patch  
359 size is caused by geological processes or human influence.

360 Another way in which endophyte assemblages may be affected by proximity to human  
361 development is through the influence of invasive plant taxa, which are often much more  
362 abundant near development than in wilderness areas. Invasive host taxa could influence  
363 endophytes in a variety of ways—from changing the inoculum pool within an area (i.e.  
364 “neighborhood” effects; Moeller et al. 2015), bringing along endophyte taxa or genotypes  
365 from the ancestral range of the host (Dickie et al. 2017), or affecting many other aspects of the  
366 local ecology (e.g. shifting fire regimes [Brooks et al. 2004], determining litter deposition rate  
367 and elemental composition [Allison and Vitousek 2004], influencing herbivore assemblages  
368 [Forister 2009], etc.).

369 All these anecdotes support the idea that endophyte assemblages in relatively undisturbed  
370 areas, such as portions of the Amazon or the Siberian forest, are likely to be different from  
371 those in conspecific hosts growing near human habitation or that are being actively cultivated  
372 (Coleman-Derr et al. 2016). Even if different microbial taxa are not observed in remote  
373 environs, study of the shifts in relative abundances among endophyte assemblages along  
374 urbanization and pollution gradients could provide insight into how endophytes interact and  
375 communities assemble (e.g., Gazis and Chaverri 2015).

*Much of the host phylogeny remains unexplored—what might we be missing?*

376 We found that members of about a third of plant families have been surveyed for fungal  
377 endophytes and only about a tenth of plant families are represented among bacterial studies.  
378 These results demonstrate how large the gap is in our understanding, and suggest we are  
379 likely missing the majority of the scope and distribution of endophytes among all plants. It is  
380 true that many endophytic taxa are known to have broad host ranges (e.g., Arnold and Lut-  
381 zoni 2007), thus one could argue that an understanding of endophyte biodiversity does not  
382 hinge on thorough sampling of potential host taxa. However, we note that, in the majority  
383 of multivariate studies of endophyte biogeography, host taxon is an important predictor of  
384 assemblage variation (Griffin et al. 2019, Kivlin et al. 2019)—albeit a sometimes modest one  
385 (Vincent et al. 2015). Moreover, we know almost nothing regarding the host range of those  
386 rare endophyte taxa that compose the bulk of most assemblages (Arnold and Lutzoni 2007).  
387 An additional justification for surveying broadly across the plant phylogeny is the discovery

388 of specialist endophyte taxa—indeed, many of the most interesting and well known inter-  
389 actions between plants and endophytes involve relatively specialized, vertically-transmitted  
390 endophytes; for instance, the seed-borne fungal endophytes of grasses and locoweeds (Clay  
391 and Schardl 2002, Ralphs et al. 2008).

392 Comparative studies of host breadth among endophytes, including among rare taxa and  
393 also widespread, apparently generalized taxa (e.g. *Colletotrichum tropicale*; see Griffin and  
394 Carson 2018), would facilitate studies of the physiological mechanisms associated with plant-  
395 endophyte interactions. For example, generalist endophytes must possess mechanisms for  
396 dealing with a variety of host defences, despite those endophytes possessing common traits  
397 targeted by plant immune systems (e.g. molecules such as flagellin and chitin; Chisholm  
398 et al. 2006, Jones and Dangl 2006). Understanding the nature of those mechanisms would  
399 be streamlined through delimitation of endophyte host ranges, because comparative genomics  
400 and cellular biology studies could be more expeditiously directed. For instance, host taxa  
401 that are closely related but that differ in suitability for a particular endophyte could be  
402 targeted for study of the molecular and genetic basis of endophyte symbiosis.

403 Though studies clearly delineating endophyte host range are desperately needed, given  
404 the daunting scale of the sampling required, where then should we begin? First, we suggest  
405 that information sharing among studies will be critical. We must be able to compare data  
406 among studies to build checklists of where certain sequences, corresponding to specific taxa,  
407 have been found. Such efforts have been hampered by the constraints of PCR as the choice  
408 of primer inevitably biases against certain endophyte taxa and complicates comparison of  
409 studies that relied on differing primers (Nilsson et al. 2018). In the near future, such con-  
410 straints will be reduced or eliminated through the use of PCR-free sequencing technology  
411 (Jones et al. 2015). Meanwhile, we suggest a shift from *de novo* operational taxonomic de-  
412 lineation (OTU) to the use of exact sequence variants (ESVs) to allow information sharing  
413 among studies (see further discussion below; Callahan et al. 2017).

414 Additionally, we suggest targeting those plant lineages with unique traits, such as pro-  
415 duction of specific secondary metabolites, or preferences for restricted or harsh habitats (e.g.  
416 halophiles and extremophiles). As an example, certain *Astragalus* taxa can hyperaccumulate  
417 selenium, and recent research has suggested that these plants may harbor unusual endophytic  
418 taxa that could influence selenium uptake (Sura-de Jong et al. 2015, Lindblom et al. 2018,  
419 2013). Following a similar rationale, we also suggest surveying those plant families that are  
420 phylogenetically distinctive. If coevolution or codivergence has occurred between hosts and  
421 their endophytes, than unusual endophytic taxa could occur in hosts characterizing remote  
422 portions of the plant phylogeny (Hassani et al. 2019). Non-vascular plants, in particular,  
423 deserve more attention as these plants have dramatically different evolutionary histories,  
424 physiology, growth habits, and preferred habitats than vascular plants.

425 Within lineages (i.e., plant families or genera), we suggest focusing on those taxa with  
426 unique range sizes—whether large or small. Hosts with large ranges offer the opportunity  
427 to study the effects of abiotic gradients on endophyte assemblages without confounding host  
428 taxonomic variation with covariates of interest, because the same host taxon spans the entire  
429 gradient. Moreover, plant taxa with large ranges are often ecologically important, thus un-  
430 derstanding the role of their microbiomes could provide insight into how endophytes could  
431 mediate ecosystem-level processes. Plants with small range sizes also represent profitable

432 opportunities for study. First, many geographically restricted taxa prefer unique soil types,  
433 or otherwise harsh conditions that few plants can survive (Rundel et al. 2015, Rabinowitz  
434 1981). Such contingencies could favor adaptations by both hosts and endophytes that dis-  
435 tinguish them from sister taxa and their study could thus improve knowledge of endophyte  
436 biodiversity and facilitate insights into endophyte evolution. The study of geographically  
437 restricted hosts could also help delineate the influence of host macroevolution on endophyte  
438 assemblages, because these host taxa include both species (or infrataxa) which have recently  
439 diverged from their sister taxon and those taxa that are in the process of going extinct (of  
440 course, these two categories are not mutually exclusive). Recently diverged taxa could offer  
441 insight into how endophyte-host interactions form and are maintained. On the other hand,  
442 host lineages that are in the process of extinction are worth surveying to ensure that in-  
443 teresting specialist endophytic taxa do not disappear along with their hosts before they are  
444 even described.

*An example of small-scale biogeography: the effects of tissue type on endophyte assemblages*

445 Our meta-analysis revealed no significant differences in richness and diversity between  
446 leaves, stems, and roots (Figs. S1 & S2). However, we acknowledge that the meta-analysis  
447 suffered from a lack of power. This led us to pursue a vote counting procedure whereby  
448 we could consider more studies (a total of 243) because criteria for consideration were less  
449 restrictive. Results from vote counting were similar to those from the meta-analysis (Ta-  
450 bles S1–S3), though our vote counting approach more clearly suggested that in woody plants  
451 stems had higher richness than other tissues, for both fungi and bacteria. However, for  
452 graminoids, roots were the richest tissue. For forbs, inter-tissue patterns in richness were  
453 less clear. These results seem conflicting but may suggest that tissues with greater lifetime  
454 inocula exposure have the highest richness across plant life histories. Indeed, several stud-  
455 ies have demonstrated that older leaves typically harbor richer microbial assemblages than  
456 younger leaves, presumably because of greater exposure to inoculum and increased time for  
457 microbial growth (Arnold et al. 2003, Ercolani 1991). Stems and bark of woody plants are  
458 exposed to inocula in air, water, and dust year round and have long lifespans, whereas leaves,  
459 even for evergreen trees, do not persist for nearly as long. Similarly, roots are the longest-  
460 lived tissues of many perennial forbs and graminoids, as above-ground tissues of these hosts  
461 often senesce annually. It is true that roots of woody-stemmed plants can be quite long-lived,  
462 however roots are primarily encountering inoculum from the surrounding soil matrix, thus  
463 it is possible that there is greater variation in the inoculum encountered by stems than by  
464 roots over the lives of those tissues. Alternatively, perhaps the resources available to mi-  
465 crobes within stems of woody-plants favored higher richness compared to leaves, particularly  
466 of latent saprotrophs that catabolize lignin or other structural carbohydrates (Oses et al.  
467 2006, 2008). These hypotheses are not mutually exclusive and await experimental testing.

468 Our meta analysis and vote counting survey come with several caveats. First, it is possible  
469 that the efficacy of surface sterilization may vary with tissue type; thus, for instance, the  
470 high fungal richness in bark that we report could be because it was more difficult to surface  
471 sterilize than leaves. Also, while we chose those studies that had the same sample size  
472 between each tissue type, it was not always apparent that the same mass was used for each  
473 sample. Moreover, for culture-based assays, the surface area exposed to growth media may  
474 be confounded with tissue type. For instance it can be difficult to cut stems or roots into

475 slivers as thin as a leaf. However, one would expect this bias would lead to higher richness  
476 in leaves, which we generally did not observe (Tables S1–S3). Additionally, both culture and  
477 sequence-based surveys suffer from taxonomic biases (Carini 2019, Nilsson et al. 2018) and if  
478 those biases coincide with taxonomic variation among tissue types, then richness estimates  
479 will be incorrect. Nevertheless, our analysis demonstrates the existence of clear patterns in  
480 richness among tissue types and suggests several hypotheses for those patterns that deserve  
481 further study.

*How can we best share information among studies?*

482 The breadth of literature pertaining to endophytes is remarkable and ripe for meta-  
483 analysis and synthesis (e.g., Meiser et al. 2014). As we catalogued the reproducibility of  
484 studies, we were pleased to find that many studies provided access to data. For instance, in  
485 37.6% of studies reliant upon sequence-dependent methods the unprocessed DNA sequences  
486 were deposited in an online repository (e.g., GenBank). These data should be invaluable to  
487 future research aimed at defining the scope of endophyte biodiversity. However, it was quite  
488 rare for sufficient detail to be provided regarding sequence processing—including options  
489 and versions for software used and date accessed for taxonomy training databases, which  
490 are in constant flux. Given the challenge in reprocessing data and the influence different  
491 bioinformatic pipelines can have on results (e.g., Pauvert et al. 2019), we suggest that pub-  
492 lication of polished data and scripts should be considered to facilitate information sharing  
493 among studies. Those data that would be most amenable to meta-analysis include replicate  
494 by taxon tables, sequences of ESVs, and the taxonomic hypotheses for those sequences.

495 Most of the sequence-based surveys that we encountered relied on a traditional defini-  
496 tion of OTUs where sequences that were similar to one another (typically a 97% similarity  
497 threshold) were collapsed into a consensus sequence and counted. There has been an ongoing  
498 dialogue regarding if OTUs should be done away with in favor of exact sequence variants  
499 (ESVs), which provide single nucleotide resolution when determining sequence divergence.  
500 Callahan et al. (2017) have argued that ESVs should replace OTUs because the former  
501 provides benefits for sharing of information across studies since an ESV is a fixed, defined  
502 sequence and an OTU is not. An OTU often encompasses multiple genetic variants and the  
503 consensus sequence depends upon the data analyzed, at least when performing *de novo* OTU  
504 delineation, as is typical. While other authors (e.g., Nilsson et al. 2018) have questioned the  
505 suitability of ESVs given that the standard barcoding loci (i.e., 16s and ITS portions of  
506 the ribosomal operon) can have paralogs scattered throughout the genome (Brewer et al.  
507 2019, Lofgren et al. 2019, Louca et al. 2018), thus one could obtain multiple ESVs from the  
508 same organism. Indeed, this poses challenges to the calculation of relative abundances, but  
509 this issue is only partially ameliorated through the use of traditionally delineated OTUs,  
510 which would still be subject to biases imposed by copy number variation in marker loci. A  
511 long-standing criticism of OTUs is that their designation does not reliably correspond to  
512 any level within the taxonomic hierarchy. For instance, OTUs can be either above or below  
513 the species level (Nilsson et al. 2008, Gazis et al. 2011). In contrast, ESVs have a very well  
514 defined biological meaning as they are simply a genotype at a locus. The level of resolution  
515 afforded by ESVs could thus allow much more accurate estimates of endophyte host and ge-  
516 ographic ranges than OTUs and even occasionally provide insight into ecologically-relevant  
517 genetic variation within an endophytic taxon (e.g., Harrison et al. 2018).

518 As a final suggestion for improving information sharing, we suggest that authors consider  
519 depositing vouchers of host taxa studied and cultures obtained in an herbarium whenever  
520 possible (Fig. 2d). This suggestion is motivated by fascinating new work by Daru et al.  
521 (2019) who have shown that endophytes within herbarium specimens can be sequenced,  
522 and, in some cases, even cultured. Thus, vouchers could act as “time capsules” that preserve  
523 endophyte genotypes and could afford unprecedented insight into endophyte evolution and  
524 shifts in host and geographic range over time. Deposited cultures could provide many of  
525 the same benefits, but would also allow researchers to grow endophytes of interest to meet  
526 various experimental goals. Finally, the plant taxonomy is ever-changing, thus as future  
527 researchers interpret published work, they may wish to examine vouchers to determine the  
528 most current taxonomic placement of the focal host. In sum, we see herbaria as tremendous  
529 resources for the study of the plant microbiome, and, consequently, we urge participation in  
530 their continued development.

### Conclusion

531 To understand the evolutionary forces and ecological pressures that define endophyte  
532 assemblages, the delineation of biogeographic patterns in endophyte biodiversity is required.  
533 The enthusiasm among microbial ecologists for endophyte biology paired with the tools we  
534 now have at our collective disposal, suggests that such patterns are within grasp. We hope  
535 that our survey inspires others to fill the gaps in knowledge that we report. To that end,  
536 we have made the metadata from each study that we consider available (see supplemental  
537 material) in hopes that other researchers mine them for additional insights.

## Acknowledgments

538  
539 JGH was supported by the National Science Foundation EPSCoR grant 1655726. Thanks go  
540 to Lyra Beltran for assistance extracting data from publications. This review was inspired  
541 by conversations with Betsy Arnold, to whom we offer our thanks.

## Data availability

542  
543 All scripts and processed data are available at:  
544 <https://bitbucket.org/harrisonjg/endophytereview/src/master/>

## References

- Allison, S. D. and Vitousek, P. M. (2004). Rapid nutrient cycling in leaf litter from invasive plants in Hawai'i. *Oecologia*, 141(4):612–619.
- Aly, A. H., Debbab, A., Kjer, J., and Proksch, P. (2010). Fungal endophytes from higher plants: a prolific source of phytochemicals and other bioactive natural products. *Fungal Diversity*, 41(1):1–16.

- Andrews, J. H., Kinkel, L. L., Berbee, F. M., and Nordheim, E. V. (1987). Fungi, leaves, and the theory of island biogeography. *Microbial Ecology*, 14(3):277–290.
- Arnold, A. E. and Lutzoni, F. (2007). Diversity and host range of foliar fungal endophytes: are tropical leaves biodiversity hotspots? *Ecology*, 88(3):541–549.
- Arnold, A. E., Mejía, L. C., Kyllo, D., Rojas, E. I., Maynard, Z., Robbins, N., and Herre, E. A. (2003). Fungal endophytes limit pathogen damage in a tropical tree. *Proceedings of the National Academy of Sciences*, 100(26):15649–15654.
- Baas Becking, L. G. M. (1934). *Geobiologie of inleiding tot de milieukunde*. W.P. Van Stockum & Zoon, The Hague, the Netherlands.
- Bowman, E. A. and Arnold, A. E. (2018). Distributions of ectomycorrhizal and foliar endophytic fungal communities associated with *Pinus ponderosa* along a spatially constrained elevation gradient. *American Journal of Botany*, 105(4):687–699.
- Brenan, J. P. M. (1978). Some aspects of the phytogeography of tropical Africa. *Annals of the Missouri Botanical Garden*, 65(2):437–478.
- Brewer, T. E., Albertsen, M., Edwards, A., Kirkegaard, R. H., Rocha, E. P. C., and Fierer, N. (2019). Unlinked rRNA genes are widespread among Bacteria and Archaea. *bioRxiv*, page 705046.
- Brooks, M. L., D’Antonio, C. M., Richardson, D. M., Grace, J. B., Keeley, J. E., DiTomaso, J. M., Hobbs, R. J., Pellant, M., and Pyke, D. (2004). Effects of invasive alien plants on fire regimes. *BioScience*, 54(7):677–688.
- Busby, P. E., Ridout, M., and Newcombe, G. (2016). Fungal endophytes: modifiers of plant disease. *Plant Molecular Biology*, 90(6):645–655.
- Busby, P. E., Soman, C., Wagner, M. R., Friesen, M. L., Kremer, J., Bennett, A., Morsy, M., Eisen, J. A., Leach, J. E., and Dangl, J. L. (2017). Research priorities for harnessing plant microbiomes in sustainable agriculture. *PLOS Biology*, 15(3):e2001793.
- Bálint, M., Bartha, L., O’Hara, R. B., Olson, M. S., Otte, J., Pfenninger, M., Robertson, A. L., Tiffin, P., and Schmitt, I. (2015). Relocation, high-latitude warming and host genetic identity shape the foliar fungal microbiome of poplars. *Molecular ecology*, 24(1):235–248.
- Callahan, B. J., McMurdie, P. J., and Holmes, S. P. (2017). Exact sequence variants should replace operational taxonomic units in marker-gene data analysis. *The ISME Journal*, 11(12):2639.
- Campbell, D. H. (1908). Symbiosis in fern prothalia. *The American Naturalist*, 42(495):154–165.
- Carini, P. (2019). A “cultural” renaissance: genomics breathes new life into an old craft. *mSystems*, 4(3):e00092–19.



- Carroll, G. (1988). Fungal endophytes in stems and leaves: from latent pathogen to mutualistic symbiont. *Ecology*, 69(1):2–9.
- Carroll, G. C. and Carroll, F. E. (1978). Studies on the incidence of coniferous needle endophytes in the Pacific Northwest. *Canadian Journal of Botany*, 56(24):3034–3043.
- Chase, M. W., Cameron, K. M., Freudenstein, J. V., Pridgeon, A. M., Salazar, G., van den Berg, C., and Schuiteman, A. (2015). An updated classification of Orchidaceae. *Botanical Journal of the Linnean Society*, 177(2):151–174.
- Chisholm, S. T., Coaker, G., Day, B., and Staskawicz, B. J. (2006). Host-microbe interactions: shaping the evolution of the plant immune response. *Cell*, 124(4):803–814.
- Chowdhary, K. and Kaushik, N. (2015). Fungal endophyte diversity and bioactivity in the Indian medicinal plant *Ocimum sanctum* Linn. *PLOS ONE*, 10(11):e0141444.
- Christian, N., Herre, E. A., and Clay, K. (2019). Foliar endophytic fungi alter patterns of nitrogen uptake and distribution in *Theobroma cacao*. *New Phytologist*.
- Christian, N., Herre, E. A., Mejia, L. C., and Clay, K. (2017). Exposure to the leaf litter microbiome of healthy adults protects seedlings from pathogen damage. *Proc. R. Soc. B*, 284(1858):20170641.
- Christian, N., Whitaker, B. K., and Clay, K. (2015). Microbiomes: unifying animal and plant systems through the lens of community ecology theory. *Frontiers in microbiology*, 6.
- Clay, K. and Holah, J. (1999). Fungal endophyte symbiosis and plant diversity in successional fields. *Science*, 285(5434):1742–1744.
- Clay, K. and Schardl, C. (2002). Evolutionary origins and ecological consequences of endophyte symbiosis with grasses. *The American Naturalist*, 160(S4):S99–S127.
- Coleman-Derr, D., Desgarenes, D., Fonseca-Garcia, C., Gross, S., Clingenpeel, S., Woyke, T., North, G., Visel, A., Partida-Martinez, L. P., and Tringe, S. G. (2016). Plant compartment and biogeography affect microbiome composition in cultivated and native *Agave* species. *New Phytologist*, 209(2):798–811.
- Compant, S., Duffy, B., Nowak, J., Clément, C., and Barka, E. A. (2005). Use of plant growth-promoting bacteria for biocontrol of plant diseases: principles, mechanisms of action, and future prospects. *Applied and Environmental Microbiology*, 71(9):4951–4959.
- Compant, S., Sessitsch, A., and Mathieu, F. (2012). The 125th anniversary of the first postulation of the soil origin of endophytic bacteria – a tribute to M.L.V. Galippe. *Plant and Soil*, 356(1):299–301.
- Cooper, H. and Hedges, L. V. (1993). *The handbook of research synthesis*. Russell Sage Foundation.

- Crowl, T. A., Crist, T. O., Parmenter, R. R., Belovsky, G., and Lugo, A. E. (2008). The spread of invasive species and infectious disease as drivers of ecosystem change. *Frontiers in Ecology and the Environment*, 6(5):238–246.
- Daru, B. H., Bowman, E. A., Pfister, D. H., and Arnold, A. E. (2019). A novel proof of concept for capturing the diversity of endophytic fungi preserved in herbarium specimens. *Philosophical Transactions of the Royal Society B: Biological Sciences*, 374(1763):20170395.
- Davis, E. C. and Shaw, A. J. (2008). Biogeographic and phylogenetic patterns in diversity of liverwort-associated endophytes. *American Journal of Botany*, 95(8):914–924.
- de Bary, A. (1866). *Morphologie und physiologie der Pilze, Flechten und Myxomyceten*. W. Engelmann, Leipzig, Germany.
- Dickie, I. A., Bufford, J. L., Cobb, R. C., Desprez-Loustau, M.-L., Grelet, G., Hulme, P. E., Klironomos, J., Makiola, A., Nuñez, M. A., Pringle, A., Thrall, P. H., Tourtellot, S. G., Waller, L., and Williams, N. M. (2017). The emerging science of linked plant–fungal invasions. *New Phytologist*, 215(4):1314–1332.
- Dietz, T., Rosa, E. A., and York, R. (2007). Driving the human ecological footprint. *Frontiers in Ecology and the Environment*, 5(1):13–18.
- Doty, S. L. (2008). Enhancing phytoremediation through the use of transgenics and endophytes. *New Phytologist*, 179(2):318–333.
- Ercolani, G. L. (1991). Distribution of epiphytic bacteria on olive leaves and the influence of leaf age and sampling time. *Microbial Ecology*, 21(1):35–48.
- Federhen, S. (2012). The NCBI Taxonomy database. *Nucleic Acids Research*, 40(Database issue):D136–D143.
- Forister, M. L. (2009). Anthropogenic islands in the arid West: comparing the richness and diversity of insect communities in cultivated fields and neighboring wildlands. *Environmental Entomology*, 38(4):1028–1037.
- Friesen, M. L., Porter, S. S., Stark, S. C., Wettberg, E. J. v., Sachs, J. L., and Martinez-Romero, E. (2011). Microbially mediated plant functional traits. *Annual Review of Ecology, Evolution, and Systematics*, 42(1):23–46.
- Galippe, V. (1887). Note sur la présence de micro-organismes dans les tissus végétaux. *Comptes Rendus des Seances de la Societe de Biologie et de ses Filiales*, 39:410–416.
- Gazis, R. and Chaverri, P. (2015). Wild trees in the Amazon basin harbor a great diversity of beneficial endosymbiotic fungi: is this evidence of protective mutualism? *Fungal Ecology*, 17:18–29.
- Gazis, R., Rehner, S., and Chaverri, P. (2011). Species delimitation in fungal endophyte diversity studies and its implications in ecological and biogeographic inferences. *Molecular Ecology*, 20(14):3001–3013.

- Giauque, H. and Hawkes, C. V. (2013). Climate affects symbiotic fungal endophyte diversity and performance. *American journal of botany*, 100(7):1435–1444.
- Golan, J. J. and Pringle, A. (2017). Long-distance dispersal of fungi. *Microbiology Spectrum*, 5(4).
- Granzow, S., Kaiser, K., Wemheuer, B., Pfeiffer, B., Daniel, R., Vidal, S., and Wemheuer, F. (2017). The effects of cropping regimes on fungal and bacterial communities of wheat and faba bean in a greenhouse pot experiment differ between plant species and compartment. *Frontiers in Microbiology*, 8.
- Griffin, E. A. and Carson, W. P. (2015). The ecology and natural history of foliar bacteria with a focus on tropical forests and agroecosystems. *The Botanical Review*, 81(2):105–149.
- Griffin, E. A. and Carson, W. P. (2018). Tree endophytes: cryptic drivers of tropical forest diversity. In *Endophytes of Forest Trees*, Forestry Sciences, pages 63–103. Springer, Cham.
- Griffin, E. A., Harrison, J. G., Kembel, S. W., Carrell, A. A., Joseph Wright, S., and Carson, W. P. (2019). Plant host identity and soil macronutrients explain little variation in sapling endophyte community composition: is disturbance an alternative explanation? *Journal of Ecology*, 107(4):1876–1889.
- Griffin, E. A., Traw, M. B., Morin, P. J., Pruitt, J. N., Wright, S. J., and Carson, W. P. (2016). Foliar bacteria and soil fertility mediate seedling performance: a new and cryptic dimension of niche differentiation. *Ecology*, 97(11):2998–3008.
- Griffin, E. A., Wright, S. J., Morin, P. J., and Carson, W. P. (2017). Pervasive interactions between foliar microbes and soil nutrients mediate leaf production and herbivore damage in a tropical forest. *New Phytologist*, 216(1):99–112.
- Hardoim, P. R., van Overbeek, L. S., and Elsas, J. D. v. (2008). Properties of bacterial endophytes and their proposed role in plant growth. *Trends in Microbiology*, 16(10):463–471.
- Harrison, J. G., Parchman, T. L., Cook, D., Gardner, D. R., and Forister, M. L. (2018). A heritable symbiont and host-associated factors shape fungal endophyte communities across spatial scales. *Journal of Ecology*, 106(6):2274–2286.
- Hassani, M. A., Özkurt, E., Seybold, H., Dagan, T., and Stukenbrock, E. H. (2019). Interactions and coadaptation in plant metaorganisms. *Annual Review of Phytopathology*, 57(1):null.
- Helander, M., Ahlholm, J., Sieber, T. N., Hinneri, S., and Saikkonen, K. (2007). Fragmented environment affects birch leaf endophytes. *New Phytologist*, 175(3):547–553.
- Helander, M. L., Sieber, T. N., Petrini, O., and Neuvonen, S. (1994). Endophytic fungi in Scots pine needles: spatial variation and consequences of simulated acid rain. *Canadian Journal of Botany*, 72(8):1108–1113.

- Herre, E. A., Mejía, L. C., Kyllö, D. A., Rojas, E., Maynard, Z., Butler, A., and Bael, S. A. V. (2007). Ecological implications of anti-pathogen effects of tropical fungal endophytes and mycorrhizae. *Ecology*, 88(3):550–558.
- Higginbotham, S. J., Arnold, A. E., Ibañez, A., Spadafora, C., Coley, P. D., and Kursar, T. A. (2013). Bioactivity of fungal endophytes as a function of endophyte taxonomy and the taxonomy and distribution of their host plants. *PLOS ONE*, 8(9):e73192.
- Higgins, K. L., Arnold, A. E., Coley, P. D., and Kursar, T. A. (2014). Communities of fungal endophytes in tropical forest grasses: highly diverse host-and habitat generalists characterized by strong spatial structure. *Fungal Ecology*, 8:1–11.
- Hyde, K. D. and Soyong, K. (2008). The fungal endophyte dilemma. *Fungal Diversity*, 33(163):e173.
- Jones, J. D. G. and Dangl, J. L. (2006). The plant immune system. *Nature*, 444(7117):323–329.
- Jones, M. B., Highlander, S. K., Anderson, E. L., Li, W., Dayrit, M., Klitgord, N., Fabani, M. M., Seguritan, V., Green, J., Pride, D. T., Yooseph, S., Biggs, W., Nelson, K. E., and Venter, J. C. (2015). Library preparation methodology can influence genomic and functional predictions in human microbiome research. *Proceedings of the National Academy of Sciences*, 112(45):14024–14029.
- Jumpponen, A. (2001). Dark septate endophytes – are they mycorrhizal? *Mycorrhiza*, 11(4):207–211.
- Jurc, M., Jurc, D., Gogala, N., and Simoncic, P. (1996). Air pollution and fungal endophytes in needles of Austrian pine. *Phyton*, 36:111–114.
- Kew and Missouri Botanical Gardens (2019). *The Plant List*, <http://www.theplantlist.org/>.
- Kharwar, R. N., Mishra, A., Gond, K. S., Stierle, A., and Stierle, D. (2011). Anticancer compounds derived from fungal endophytes: their importance and future challenges. *Natural Product Reports*, 28(7):1208–1228.
- Kharwar, R. N., Verma, V. C., Strobel, G., and Ezra, D. (2008). The endophytic fungal complex of *Catharanthus roseus* (L.) G. Don. *Current Science*, 95(2):228–233.
- Kivlin, S. N., Kazenel, M. R., Lynn, J. S., Lee Taylor, D., and Rudgers, J. A. (2019). Plant identity influences foliar fungal symbionts more than elevation in the Colorado Rocky Mountains. *Microbial Ecology*, pages 1–11.
- Koenig, R. (2008). Critical time for African rainforests. *Science*, 320(5882):1439–1441.
- Kusari, S., Hertweck, C., and Spiteller, M. (2012). Chemical ecology of endophytic fungi: origins of secondary metabolites. *Chemistry & Biology*, 19(7):792–798.

- Laforest-Lapointe, I., Messier, C., and Kembel, S. W. (2017a). Tree leaf bacterial community structure and diversity differ along a gradient of urban intensity. *mSystems*, 2(6):e00087–17.
- Laforest-Lapointe, I., Paquette, A., Messier, C., and Kembel, S. W. (2017b). Leaf bacterial diversity mediates plant diversity and ecosystem function relationships. *Nature*, 546(7656):145–147.
- Lappalainen, J. H., Koricheva, J., Helander, M. L., and Haukioja, E. (1999). Densities of endophytic fungi and performance of leafminers (Lepidoptera: Eriocraniidae) on birch along a pollution gradient. *Environmental Pollution*, 104(1):99–105.
- Lau, M. K., Arnold, A. E., and Johnson, N. C. (2013). Factors influencing communities of foliar fungal endophytes in riparian woody plants. *Fungal Ecology*, 6(5):365–378.
- Letunic, I. and Bork, P. (2016). Interactive tree of life (iTOL) v3: an online tool for the display and annotation of phylogenetic and other trees. *Nucleic Acids Research*, 44(W1):W242–W245.
- Lindblom, S. D., Valdez-Barillas, J. R., Fakra, S. C., Marcus, M. A., Wangeline, A. L., and Pilon-Smits, E. A. H. (2013). Influence of microbial associations on selenium localization and speciation in roots of *Astragalus* and *Stanleya* hyperaccumulators. *Environmental and Experimental Botany*, 88:33–42.
- Lindblom, S. D., Wangeline, A. L., Barillas, V., Rodolfo, J., deVilbiss, B., Fakra, S., and Pilon-Smits, E. A. H. (2018). Fungal endophyte *Alternaria tenuissima* can affect growth and selenium accumulation in its hyperaccumulator host *Astragalus bisulcatus*. *Frontiers in Plant Science*, 9.
- Linder, H. P. (2001). Plant diversity and endemism in sub-Saharan tropical Africa. *Journal of Biogeography*, 28(2):169–182.
- Lodge, D. J., Fisher, P., and Sutton, B. (1996). Endophytic fungi of *Manilkara bidentata* leaves in Puerto Rico. *Mycologia*, pages 733–738.
- Lofgren, L. A., Uehling, J. K., Branco, S., Bruns, T. D., Martin, F., and Kennedy, P. G. (2019). Genome-based estimates of fungal rDNA copy number variation across phylogenetic scales and ecological lifestyles. *Molecular Ecology*, 28(4):721–730.
- Lopez, B. R., Bashan, Y., and Bacilio, M. (2011). Endophytic bacteria of *Mammillaria fraileana*, an endemic rock-colonizing cactus of the southern Sonoran Desert. *Archives of Microbiology*, 193(7):527–541.
- Louca, S., Doebeli, M., and Parfrey, L. W. (2018). Correcting for 16s rRNA gene copy numbers in microbiome surveys remains an unsolved problem. *Microbiome*, 6(1):41.
- MacArthur, R. H. and Wilson, E. O. (2001). *The Theory of Island Biogeography*. Princeton University Press. Google-Books-ID: a10cdkywhVgC.

- Malloch, D. and Blackwell, M. (1992). Dispersal of fungal diaspores. In *The fungal community: its organization and role in the ecosystem*, pages 147–171. Marcel Dekker, Inc, New York, NY, second edition edition.
- Massimo, N. C., Devan, M. M. N., Arendt, K. R., Wilch, M. H., Riddle, J. M., Furr, S. H., Steen, C., U'Ren, J. M., Sandberg, D. C., and Arnold, A. E. (2015). Fungal endophytes in aboveground tissues of desert plants: infrequent in culture, but highly diverse and distinctive symbionts. *Microbial Ecology*, 70(1):61–76.
- Meiser, A., Bálint, M., and Schmitt, I. (2014). Meta-analysis of deep-sequenced fungal communities indicates limited taxon sharing between studies and the presence of biogeographic patterns. *New Phytologist*, 201(2):623–635.
- Mishra, A., Gond, S. K., Kumar, A., Sharma, V. K., Verma, S. K., Kharwar, R. N., and Sieber, T. N. (2012). Season and tissue type affect fungal endophyte communities of the Indian medicinal plant *Tinospora cordifolia* more strongly than geographic location. *Microbial Ecology*, 64(2):388–398.
- Moeller, H. V., Dickie, I. A., Peltzer, D. A., and Fukami, T. (2015). Mycorrhizal co-invasion and novel interactions depend on neighborhood context. *Ecology*, 96(9):2336–2347.
- Moissl-Eichinger, C., Pausan, M., Taffner, J., Berg, G., Bang, C., and Schmitz, R. A. (2018). Archaea are interactive components of complex microbiomes. *Trends in Microbiology*, 26(1):70–85.
- Müller, H., Berg, C., Landa, B. B., Auerbach, A., Moissl-Eichinger, C., and Berg, G. (2015). Plant genotype-specific archaeal and bacterial endophytes but similar *Bacillus* antagonists colonize Mediterranean olive trees. *Frontiers in Microbiology*, 6.
- Naik, B. S., Shashikala, J., and Krishnamurthy, Y. L. (2009). Study on the diversity of endophytic communities from rice (*Oryza sativa* L.) and their antagonistic activities in vitro. *Microbiological Research*, 164(3):290–296.
- Neill, J. C. (1940). The endophyte of rye-grass (*Lolium perenne*). *New Zealand Journal of Science and Technology, Section A*, 21(5).
- Nemergut, D. R., Schmidt, S. K., Fukami, T., O'Neill, S. P., Bilinski, T. M., Stanish, L. F., Knelman, J. E., Darcy, J. L., Lynch, R. C., Wickey, P., and Ferrenberg, S. (2013). Patterns and processes of microbial community assembly. *Microbiology and Molecular Biology Reviews*, 77(3):342–356.
- Newman, D. J., Cragg, G. M., and Snader, K. M. (2003). Natural products as sources of new drugs over the period 1981-2002. *Journal of Natural Products*, 66(7):1022–1037.
- Nilsson, R. H., Anslan, S., Bahram, M., Wurzbacher, C., Baldrian, P., and Tedersoo, L. (2018). Mycobiome diversity: high-throughput sequencing and identification of fungi. *Nature Reviews Microbiology*, page 1.

- Nilsson, R. H., Kristiansson, E., Ryberg, M., Hallenberg, N., and Larsson, K.-H. (2008). Intraspecific ITS variability in the kingdom fungi as expressed in the international sequence databases and its implications for molecular species identification. *Evolutionary Bioinformatics*, 4:EBO.S653.
- Oksanen, J., Kindt, R., Legendre, P., O'Hara, B., and Stevens, M. H. H. (2016). *vegan*: community ecology package. *CRAN*.
- Olson, D. M., Dinerstein, E., Wikramanayake, E. D., Burgess, N. D., Powell, G. V. N., Underwood, E. C., D'amico, J. A., Itoua, I., Strand, H. E., Morrison, J. C., Loucks, C. J., Allnutt, T. F., Ricketts, T. H., Kura, Y., Lamoreux, J. F., Wettengel, W. W., Hedao, P., and Kassem, K. R. (2001). Terrestrial ecoregions of the world: a new map of life on earth. *BioScience*, 51(11):933–938.
- Oono, R., Rasmussen, A., and Lefèvre, E. (2017). Distance decay relationships in foliar fungal endophytes are driven by rare taxa. *Environmental Microbiology*, 19(7):2794–2805.
- Oses, R., Valenzuela, S., Freer, J., Baeza, J., and Rodríguez, J. (2006). Evaluation of fungal endophytes for lignocellulolytic enzyme production and wood biodegradation. *International Biodeterioration & Biodegradation*, 57(2):129–135.
- Oses, R., Valenzuela, S., Freer, J., Sanfuentes, E., and Rodríguez, J. (2008). Fungal endophytes in xylem of healthy Chilean trees and their possible role in early wood decay. *Fungal Diversity*, 33(7):77–86.
- Panaccione, D. G., Beaulieu, W. T., and Cook, D. (2014). Bioactive alkaloids in vertically transmitted fungal endophytes. *Functional Ecology*, 28(2):299–314.
- Pauvert, C., Buée, M., Laval, V., Edel-Hermann, V., Fauchery, L., Gautier, A., Lesur, I., Vallance, J., and Vacher, C. (2019). Bioinformatics matters: The accuracy of plant and soil fungal community data is highly dependent on the metabarcoding pipeline. *Fungal Ecology*, 41:23–33.
- Peay, K. G., Bidartondo, M. I., and Elizabeth Arnold, A. (2010). Not every fungus is everywhere: scaling to the biogeography of fungal–plant interactions across roots, shoots and ecosystems. *New Phytologist*, 185(4):878–882.
- Peay, K. G., Bruns, T. D., Kennedy, P. G., Bergemann, S. E., and Garbelotto, M. (2007). A strong species–area relationship for eukaryotic soil microbes: island size matters for ectomycorrhizal fungi. *Ecology Letters*, 10(6):470–480.
- Peter, J., Young, W., and Haukka, K. E. (1996). Diversity and phylogeny of rhizobia. *New Phytologist*, 133(1):87–94.
- Petrini, O. (1991). Fungal endophytes of tree leaves. In Andrews, J. H. and Hirano, S. S., editors, *Microbial Ecology of Leaves*, Brock/Springer Series in Contemporary Bioscience, pages 179–197. Springer New York.

- Pianka, E. R. (1966). Latitudinal gradients in species diversity: a review of concepts. *The American Naturalist*, 100(910):33–46.
- R Core Team (2019). *R: A Language and Environment for Statistical Computing*. R Foundation for Statistical Computing, Vienna, Austria.
- Rabinowitz, D. (1981). Seven forms of rarity. In *The biological aspects of rare plant conservation*. Editor Hugh Synge, pages 205–217. John Wiley & Sons, New York, NY.
- Ralphs, M. H., Creamer, R., Baucom, D., Gardner, D. R., Welsh, S. L., Graham, J. D., Hart, C., Cook, D., and Stegelmeier, B. L. (2008). Relationship between the endophyte *Embellisia* spp. and the toxic alkaloid swainsonine in major locoweed species (*Astragalus* and *Oxytropis*). *Journal of Chemical Ecology*, 34(1):32–38.
- Redford, A. J., Bowers, R. M., Knight, R., Linhart, Y., and Fierer, N. (2010). The ecology of the phyllosphere: geographic and phylogenetic variability in the distribution of bacteria on tree leaves. *Environmental Microbiology*, 12(11):2885–2893.
- Remus-Emsermann, M. N. P. and Schlechter, R. O. (2018). Phyllosphere microbiology: at the interface between microbial individuals and the plant host. *New Phytologist*, 0(0).
- Rodriguez, R., White Jr, J., Arnold, A., and Redman, R. (2009). Fungal endophytes: diversity and functional roles. *New Phytologist*, 182(2):314–330.
- Rojas-Jimenez, K., Hernandez, M., Blanco, J., Vargas, L. D., Acosta-Vargas, L. G., and Tamayo, G. (2016). Richness of cultivable endophytic fungi along an altitudinal gradient in wet forests of Costa Rica. *Fungal Ecology*, 20:124–131.
- Rundel, P., Huggins, T., Prigge, B., and Sharifi, M. R. (2015). Rarity in *Astragalus*: a California perspective. *Aliso: A Journal of Systematic and Evolutionary Botany*, 33(2):111–120.
- Ryan, R. P., Germaine, K., Franks, A., Ryan, D. J., and Dowling, D. N. (2008). Bacterial endophytes: recent developments and applications. *FEMS Microbiology Letters*, 278(1):1–9.
- Saikkonen, K., Faeth, S. H., Helander, M., and Sullivan, T. J. (1998). Fungal endophytes: a continuum of interactions with host plants. *Annual Review of Ecology and Systematics*, 29:319–343.
- Sampson, K. (1937). Further observations on the systemic infection of *Lolium*. *Transactions of the British Mycological Society*, 21(1):84–IN9.
- Sangamesh, M. B., Jambagi, S., Vasanthakumari, M. M., Shetty, N. J., Kolte, H., Ravikanth, G., Nataraja, K. N., and Shaanker, R. U. (2017). Thermotolerance of fungal endophytes isolated from plants adapted to the Thar Desert, India. *Symbiosis*, pages 1–13.
- Schulz, B. and Boyle, C. (2005). The endophytic continuum. *Mycological Research*, 109(6):661–686.



- Schulz, B. and Boyle, C. (2006). What are endophytes? In Schulz, B. J. E., Boyle, C. J. C., and Sieber, T. N., editors, *Microbial Root Endophytes*, Soil Biology, pages 1–13. Springer Berlin Heidelberg, Berlin, Heidelberg.
- Schulz, B., Boyle, C., Draeger, S., Römmert, A.-K., and Krohn, K. (2002). Endophytic fungi: a source of novel biologically active secondary metabolites\* \*Paper presented at the British Mycological Society symposium on Fungal Bioactive Compounds, held at the University of Wales Swansea on 22–27 April 2001. *Mycological Research*, 106(9):996–1004.
- Shade, A. and Handelsman, J. (2012). Beyond the Venn diagram: the hunt for a core microbiome. *Environmental Microbiology*, 14(1):4–12.
- Shaffer, J. P., Sarmiento, C., Zalamea, P.-C., Gallery, R. E., Davis, A. S., Baltrus, D. A., and Arnold, A. E. (2016). Diversity, specificity, and phylogenetic relationships of endohyphal bacteria in fungi that inhabit tropical seeds and leaves. *Frontiers in Ecology and Evolution*, 4.
- Singh, D. K., Sharma, V. K., Kumar, J., Mishra, A., Verma, S. K., Sieber, T. N., and Kharwar, R. N. (2017). Diversity of endophytic mycobiota of tropical tree *Tectona grandis* Linn.f.: spatiotemporal and tissue type effects. *Scientific Reports*, 7(1):3745.
- Slippers, B. and Wingfield, M. J. (2007). Botryosphaeriaceae as endophytes and latent pathogens of woody plants: diversity, ecology and impact. *Fungal Biology Reviews*, 21(2):90–106.
- Stanosz, G. R., Blodgett, J. T., Smith, D. R., and Kruger, E. L. (2001). Water stress and *Sphaeropsis sapinea* as a latent pathogen of red pine seedlings. *New Phytologist*, 149(3):531–538.
- Stone, J. K., Bacon, C. W., and White, J. (2000). An overview of endophytic microbes: endophytism defined. *Microbial endophytes*, 3:29–33.
- Strobel, G. and Daisy, B. (2003). Bioprospecting for microbial endophytes and their natural products. *Microbiology and Molecular Biology Reviews*, 67(4):491–502.
- Strobel, G., Daisy, B., Castillo, U., and Harper, J. (2004). Natural products from endophytic microorganisms. *Journal of Natural Products*, 67(2):257–268.
- Strobel, G., Hess, W., Ford, E., Sidhu, R., and Yang, X. (1996). Taxol from fungal endophytes and the issue of biodiversity. *Journal of Industrial Microbiology*, 17(5):417–423.
- Sura-de Jong, M., Reynolds, R. J. B., Richterova, K., Musilova, L., Staicu, L. C., Chocholata, I., Cappa, J. J., Taghavi, S., van der Lelie, D., Frantik, T., Dolinova, I., Strejcek, M., Cochran, A. T., Lovecka, P., and Pilon-Smits, E. A. H. (2015). Selenium hyperaccumulators harbor a diverse endophytic bacterial community characterized by high selenium resistance and plant growth promoting properties. *Frontiers in Plant Science*, 6.

- Suryanarayanan, T. S., Murali, T. S., Thirunavukkarasu, N., Rajulu, M. B. G., Venkatesan, G., and Sukumar, R. (2011). Endophytic fungal communities in woody perennials of three tropical forest types of the Western Ghats, southern India. *Biodiversity and Conservation*, 20(5):913–928.
- Tóth, M. D., Halász, J. L., and Balázsy, S. (2009). Phyllospheric microbial populations of ragweed (*Ambrosia elatior* L.) plant grown in toxic metal-contaminated areas. *Archives of Agronomy and Soil Science*, 55(2):217–231.
- Unterseher, M., Karunarathna, S. C., Cruz, G. R., Dagamac, N. H., Dahl, M. B., Dool, S. E., Galla, M., Herbst, L., Nilsson, R. H., Puechmaille, S. J., Schöner, C., Schöner, M., Siddique, A. B., Teltewskoi, A., Wicke, K., Würth, D. G., Wurzbacher, C., and Hyde, K. D. (2018). Mycobiomes of sympatric *Amorphophallus albispatus* (Araceae) and *Camellia sinensis* (Theaceae) – a case study reveals clear tissue preferences and differences in diversity and composition. *Mycological Progress*, 17(4):489–500.
- Vacher, C., Cordier, T., and Vallance, J. (2016a). Phyllosphere fungal communities differentiate more thoroughly than bacterial communities along an elevation gradient. *Microbial Ecology*, 72(1):1–3.
- Vacher, C., Hampe, A., Porté, A. J., Sauer, U., Compant, S., and Morris, C. E. (2016b). The phyllosphere: microbial jungle at the plant–climate interface. *Annual Review of Ecology, Evolution, and Systematics*, 47(1):1–24.
- Vellend, M. (2010). Conceptual synthesis in community ecology. *The Quarterly review of biology*, 85(2):183–206.
- Verma, V. C., Gond, S. K., Kumar, A., Kharwar, R. N., and Strobel, G. (2007). The endophytic mycoflora of bark, leaf, and stem tissues of *Azadirachta indica* A. Juss (Neem) from Varanasi (India). *Microbial Ecology*, 54(1):119–125.
- Verma, V. C., Kharwar, R. N., and Strobel, G. A. (2009). Chemical and functional diversity of natural products from plant associated endophytic fungi. *Natural Product Communications*, 4(11):1934578X0900401114.
- Viechtbauer, W. (2010). Conducting meta-analyses in R with the metafor package. *Journal of Statistical Software*, 36(1):1–48.
- Vincent, J., Weiblen, G., and May, G. (2015). Host associations and beta diversity of fungal endophyte communities in New Guinea rainforest trees. *Molecular ecology*.
- Willems, A. (2006). The taxonomy of rhizobia: an overview. *Plant and Soil*, 287(1):3–14.
- Wilson, D. (1995). Endophyte: the evolution of a term, and clarification of its use and definition. *Oikos*, pages 274–276.
- Wolfe, E. R., Kautz, S., Singleton, S. L., and Ballhorn, D. J. (2018). Differences in foliar endophyte communities of red alder (*Alnus rubra*) exposed to varying air pollutant levels. *Botany*, 96(12):825–835.

Zimmerman, N. B. and Vitousek, P. M. (2012). Fungal endophyte communities reflect environmental structuring across a Hawaiian landscape. *Proceedings of the National Academy of Sciences*, 109(32):13022–13027.

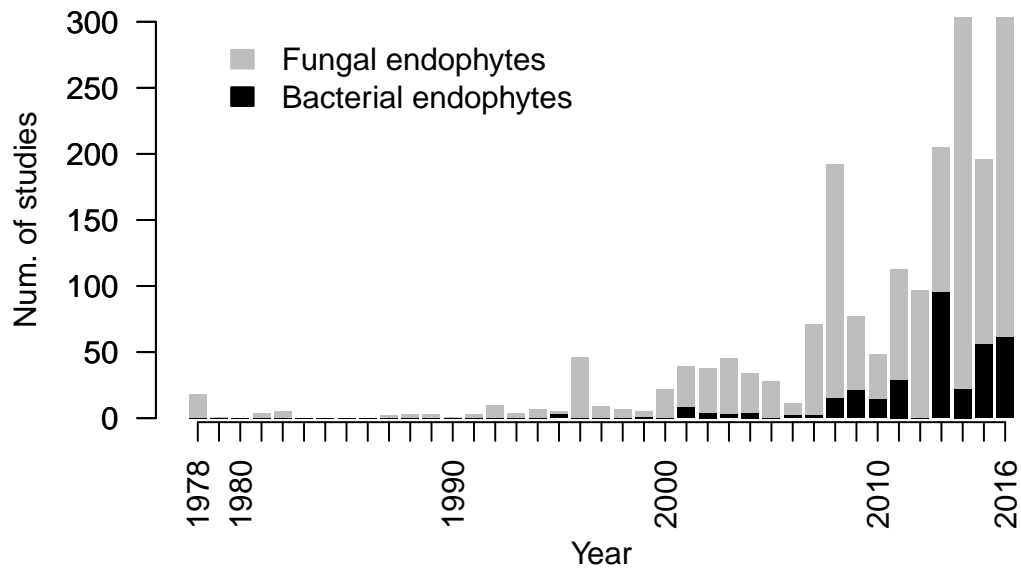

Figure 1: The number of studies characterizing endophyte biodiversity published each year since the late 1970s. Studies are parsed by taxonomy with fungal studies in grey and bacterial studies in black.

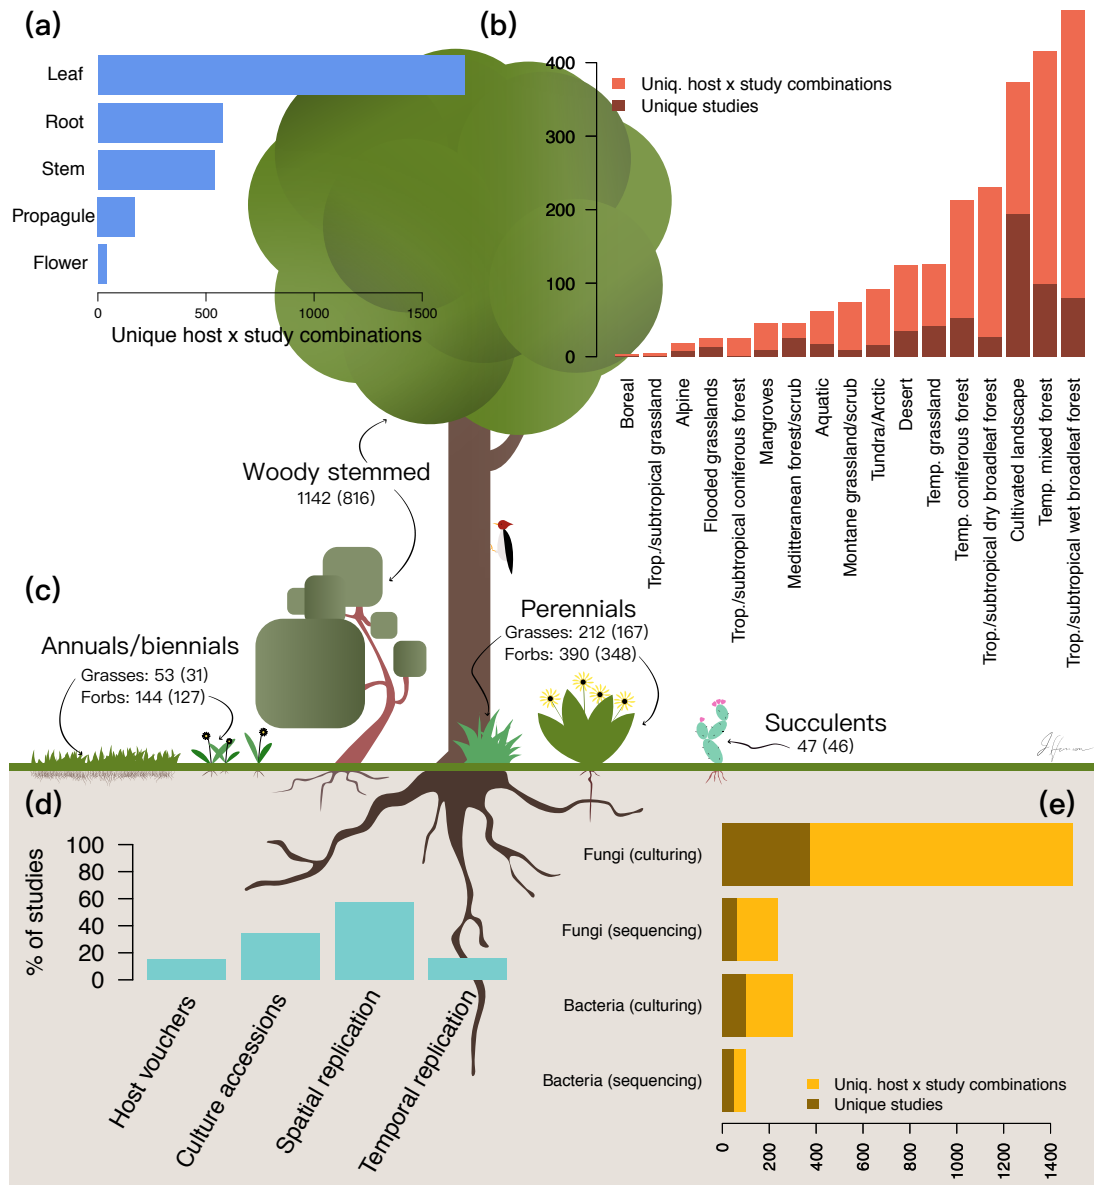

Figure 2: Summary of 596 publications characterizing endophyte biodiversity. Because many studies surveyed multiple hosts, we report both number of studies and number of unique host by study combinations. We counted the number of studies surveying each plant compartment (a), biome (b), and host life history category (c; values in parentheses are unique hosts). We also extracted information pertaining to study design and reproducibility (d). Finally, we determined the endophytic taxon characterized and the methodology employed (e).

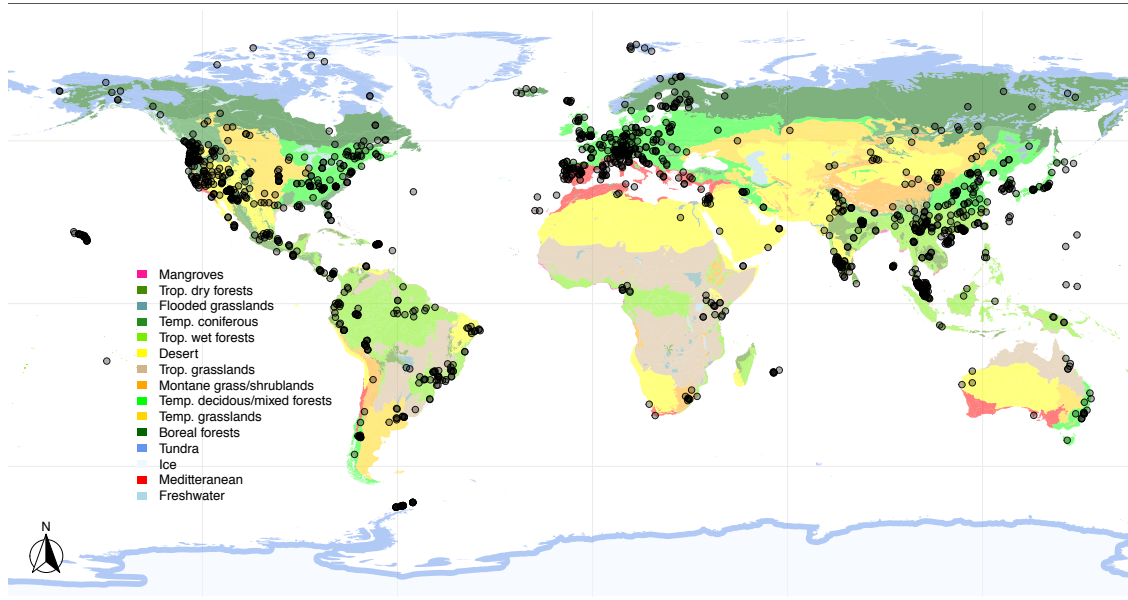

Figure 3: Locations of endophyte biodiversity studies considered. An interactive, zoomable version of this map can be found at: <https://jharrisonecoevo.github.io/EndophyteMap/>. Black points represent studies. Biomes are color coded and delineated in accordance with (Olson et al. 2001). In some cases, multiple, proximal locations were surveyed and a single point was used to graphically represent these locations.

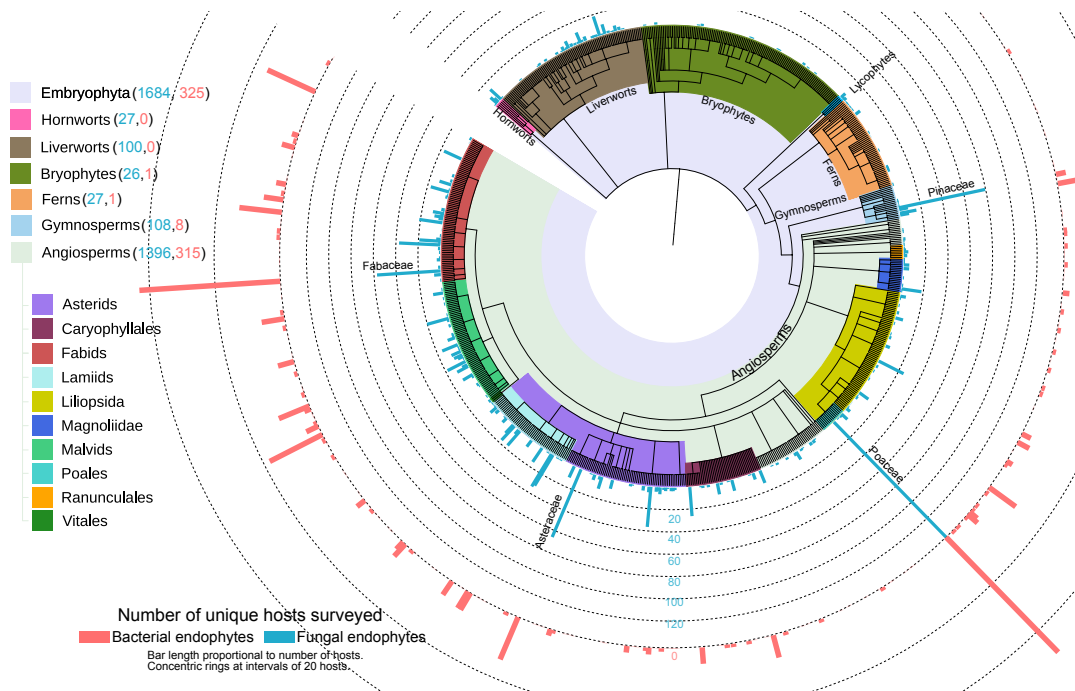

Figure 4: Survey effort across Embryophyta. Number of studies surveying fungal (blue) and bacterial (red) endophytes are shown extending outwards from the tips of the phylogeny. Tips are families. Notable taxa within Embryophyta are labeled and color-coded. Numbers in parentheses denote unique hosts surveyed. Very few surveys of bacterial endophytes have been conducted in bryophyte hosts, therefore this portion of the figure has been abbreviated.

## Supplementary Material

Table S1: Differences among host tissues in fungal (top panel) and bacterial (bottom panel) endophyte richness in woody plants. Each cell in the table provides the number of times the tissue type on that *row* (the focal tissue) had higher richness than the tissue type in that *column* (the comparison tissue) followed by the number of studies reviewed for each comparison in parentheses. Significance was determined using a binomial sign test. For results from herbaceous plants see Table S2, for results from graminoids see Table S3

|              |             | Comparison tissue (Fungi)    |       |                        |           |        |       |
|--------------|-------------|------------------------------|-------|------------------------|-----------|--------|-------|
|              |             | Leaf                         | Root  | Stem                   | Propagule | Flower | Bark  |
| Focal tissue | Leaf >      | –                            | 4 (7) | 10 (43) <sup>***</sup> | 3 (4)     | 2 (3)  | 0 (4) |
|              | Root >      | 3 (7)                        | –     | 1 (7)                  | 0 (2)     | 1 (2)  | 0 (1) |
|              | Stem >      | 33 (43) <sup>***</sup>       | 6 (7) | –                      | 3 (3)     | 2 (3)  | 1 (2) |
|              | Propagule > | 1 (4)                        | 2 (2) | 0 (3)                  | –         | 0 (1)  | 0 (0) |
|              | Flower >    | 1 (3)                        | 1 (2) | 1 (3)                  | 1 (1)     | –      | 0 (0) |
|              | Bark >      | 4 (4)                        | 1 (1) | 1 (2)                  | 0 (0)     | 0 (0)  | –     |
|              |             | Comparison tissue (Bacteria) |       |                        |           |        |       |
|              |             | Leaf                         | Root  | Stem                   |           |        |       |
| Focal tissue | Leaf >      | –                            | 2 (7) | 3 (8)                  |           |        |       |
|              | Root >      | 5 (7)                        | –     | 4 (6)                  |           |        |       |
|              | Stem >      | 5 (8)                        | 1 (6) | –                      |           |        |       |

<sup>\*\*\*</sup>p<0.01, <sup>\*\*</sup>p<0.05, <sup>\*</sup>p<0.1



Table S2: Differences among host tissues in fungal (top panel) and bacterial (bottom panel) endophyte richness in herbaceous plants. Each cell in the table provides the number of times the tissue type on that *row* (the focal tissue) had higher richness than the tissue type in that *column* (the comparison tissue) followed by the number of studies reviewed for each comparison in parentheses. Significance was determined using a binomial sign test. For results from woody plants see Table S1, for results from graminoids see Table S3

|              |             | Comparison tissue (Fungi)    |         |         |           |        |       |
|--------------|-------------|------------------------------|---------|---------|-----------|--------|-------|
|              |             | Leaf                         | Root    | Stem    | Propagule | Flower | Bark  |
| Focal tissue | Leaf >      | –                            | 10 (22) | 10 (21) | 4 (5)     | 1 (1)  | 0 (1) |
|              | Root >      | 9 (22)                       | –       | 10 (19) | 4 (5)     | 0 (1)  | 0 (1) |
|              | Stem >      | 9 (21)                       | 7 (19)  | –       | 3 (4)     | 0 (0)  | 0 (1) |
|              | Propagule > | 1 (5)                        | 1 (5)   | 1 (4)   | –         | 0 (0)  | 0 (0) |
|              |             | Comparison tissue (Bacteria) |         |         |           |        |       |
|              |             | Leaf                         | Root    | Stem    |           |        |       |
| Focal tissue | Leaf >      | –                            | 1 (6)   | 1 (5)   |           |        |       |
|              | Root >      | 5 (6)                        | –       | 6 (8)   |           |        |       |
|              | Stem >      | 4 (5)                        | 1 (8)*  | –       |           |        |       |

\*\*\*p<0.01, \*\*p<0.05, \*p<0.1

Table S3: Differences among host tissues in fungal (top panel) and bacterial (bottom panel) endophyte richness in graminoids. Each cell in the table provides the number of times the tissue type on that *row* (the focal tissue) had higher richness than the tissue type in that *column* (the comparison tissue) followed by the number of studies reviewed for each comparison in parentheses. Significance was determined using a binomial sign test. For results from woody plants see Table S1, for results from forbs see Table S2

|              |        | Comparison tissue (Fungi)    |          |          |
|--------------|--------|------------------------------|----------|----------|
|              |        | Leaf                         | Root     | Stem     |
| Focal tissue | Leaf > | –                            | 2 (6)    | 2 (4)    |
|              | Root > | 4 (6)                        | –        | 9 (11)** |
|              | Stem > | 2 (4)                        | 2 (11)** | –        |
|              |        | Comparison tissue (Bacteria) |          |          |
|              |        | Leaf                         | Root     | Stem     |
| Focal tissue | Leaf > | –                            | 1 (6)    | 1 (6)    |
|              | Root > | 5 (6)                        | –        | 9 (9)*** |
|              | Stem > | 4 (6)                        | 0 (9)*** | –        |

\*\*\*p<0.01, \*\*p<0.05, \*p<0.1

a)

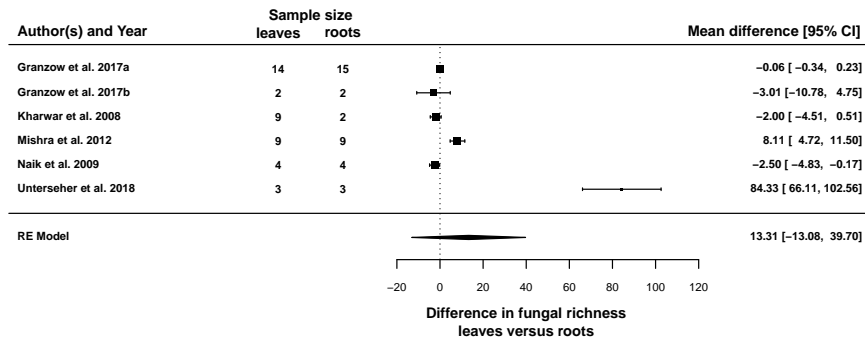

b)

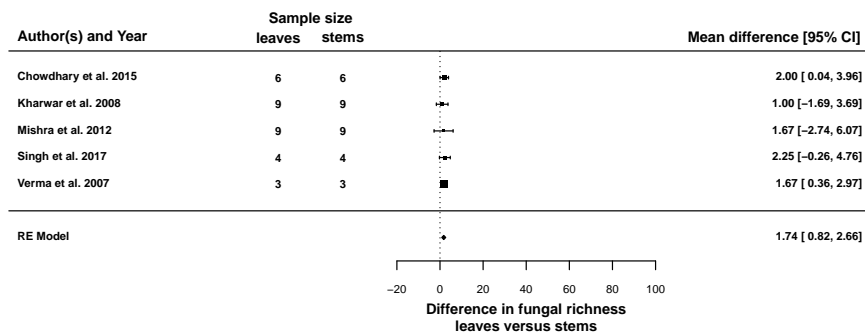

c)

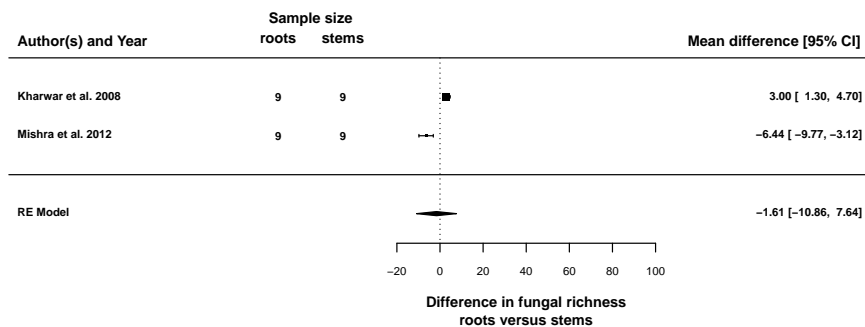

Figure S1: Differences in fungal endophyte richness among host tissues as determined through meta-analysis. Each panel depicts pairwise comparisons between two tissue types. Panel (a) depicts leaves versus roots, panel (b) leaves versus stems, and panel (c) roots versus stems. Mean differences between tissues for each study are shown in the right margins of each plot, with confidence intervals. No model was significantly supported at  $p \leq 0.05$ . Results were very similar for Shannon's diversity and can be seen in Fig. S2. Richness for Unterseher et al. (2018) was higher than the other studies because those authors relied on sequencing data whereas the other studies considered relied on culturing data. Two hosts were studied by Granzow et al. (2017) and results from each host are denoted by letters a and b.

a)

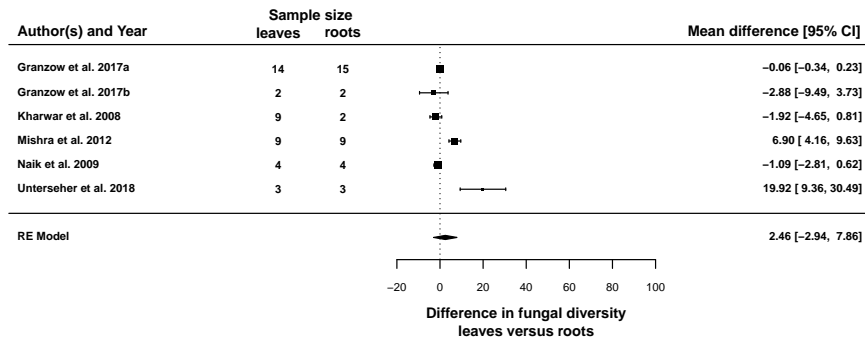

b)

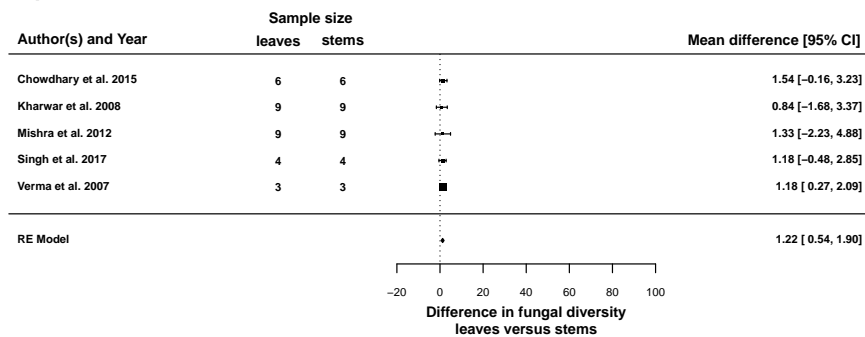

c)

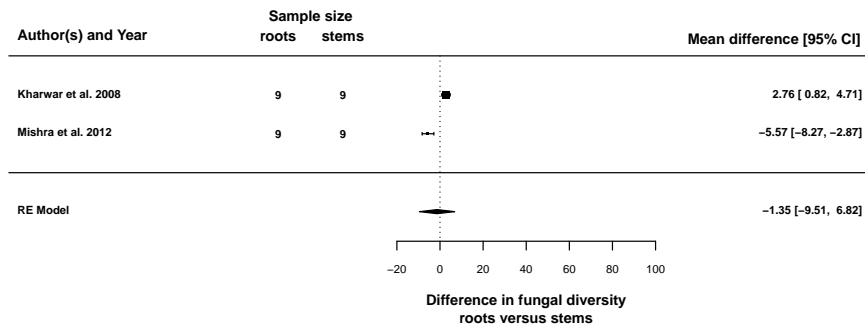

Figure S2: Differences in fungal endophyte diversity (exponentiated Shannon's entropy) among host tissues as determined through meta-analysis. Each panel depicts pairwise comparisons between two tissue types. Panel (a) depicts leaves versus roots, panel (b) leaves versus stems, and panel (c) roots versus stems. Mean differences between tissues for each study are shown in the right margins of each plot, with confidence intervals. Results were very similar for richness and can be seen in Fig. S1. Diversity for Unterseher et al. (2018) was higher than the other studies because those authors relied on sequencing data whereas the other studies considered relied on culturing data. Two hosts were studied by Granzow et al. (2017) and results from each host are denoted by letters a and b.
